# Supplementary material for: Oxazolidine Nitroxide Transformation in a Coordination Sphere of the Ln3+ Ions
Source: MDPI journal article supplement (doi:10.3390/molecules27051626), 2022-03-01
Supplement: s1 [file s1]

# Supporting Information on

## Oxazolidine Nitroxide Transformation in a Coordination Sphere of the Ln<sup>3+</sup> Ions

by Philippe Rey, Anton I. Smoletsev, and Kira E. Vostrikova\*

Nikolaev Institute of Inorganic Chemistry, Siberian Branch, Russian Academy of Sciences

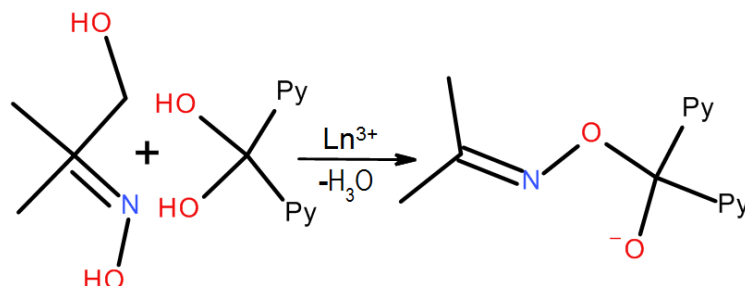

**Figure S1.** Ln<sup>3+</sup> ion supported catalytic hydrolysis transformation of the Rad into tetradentate ligand, *ipapm*.

**Table S1.** Crystal data and structure refinement for compounds 1–3.

| Identification code                                             | 1                                                                               | 2                                                                               | 3                                                                               |
|-----------------------------------------------------------------|---------------------------------------------------------------------------------|---------------------------------------------------------------------------------|---------------------------------------------------------------------------------|
| Empirical formula                                               | C <sub>28</sub> H <sub>29</sub> Cl <sub>2</sub> DyN <sub>6</sub> O <sub>4</sub> | C <sub>28</sub> H <sub>28</sub> N <sub>10</sub> O <sub>16</sub> Yb <sub>2</sub> | C <sub>40</sub> H <sub>52</sub> Ce <sub>2</sub> N <sub>10</sub> O <sub>22</sub> |
| Formula weight                                                  | 746.97                                                                          | 1106.68                                                                         | 1305.15                                                                         |
| Temperature/K                                                   | 150(2)                                                                          | 150(2)                                                                          | 150(2)                                                                          |
| Space group                                                     | <i>P</i> $\bar{1}$                                                              | <i>P</i> $\bar{1}$                                                              | <i>P</i> $\bar{1}$                                                              |
| <i>a</i> /Å                                                     | 10.1300(4)                                                                      | 9.5039(3)                                                                       | 10.7445(3)                                                                      |
| <i>b</i> /Å                                                     | 10.1774(5)                                                                      | 10.2339(3)                                                                      | 11.2134(3)                                                                      |
| <i>c</i> /Å                                                     | 15.2401(7)                                                                      | 10.7319(3)                                                                      | 12.0491(4)                                                                      |
| $\alpha$ /°                                                     | 92.624(2)                                                                       | 113.7970(10)                                                                    | 116.3640(10)                                                                    |
| $\beta$ /°                                                      | 108.139(2)                                                                      | 103.6100(10)                                                                    | 90.3170(10)                                                                     |
| $\gamma$ /°                                                     | 99.099(2)                                                                       | 101.4350(10)                                                                    | 1292.87(7)                                                                      |
| Volume/Å <sup>3</sup>                                           | 1466.76(12)                                                                     | 876.34(5)                                                                       | 1292.87(7)                                                                      |
| <i>Z</i>                                                        | 2                                                                               | 1                                                                               | 1                                                                               |
| $\rho_{\text{calc}}$ /g cm <sup>-3</sup>                        | 1.691                                                                           | 2.097                                                                           | 1.676                                                                           |
| $\mu$ /mm <sup>-1</sup>                                         | 2.774                                                                           | 5.392                                                                           | 1.826                                                                           |
| <i>F</i> (000)                                                  | 742                                                                             | 534                                                                             | 654                                                                             |
| Crystal size/mm <sup>3</sup>                                    | 0.10 × 0.10 × 0.08                                                              | 0.10 × 0.08 × 0.04                                                              | 0.15 × 0.12 × 0.04                                                              |
| $\theta$ range/°                                                | 2.037 to 28.690                                                                 | 3.743 to 30.532                                                                 | 2.039 to 30.532                                                                 |
| <i>h</i> , <i>k</i> , <i>l</i> indices range                    | -13 ≤ <i>h</i> ≤ 13,<br>-13 ≤ <i>k</i> ≤ 13,<br>-20 ≤ <i>l</i> ≤ 20             | -13 ≤ <i>h</i> ≤ 13,<br>-14 ≤ <i>k</i> ≤ 14,<br>-15 ≤ <i>l</i> ≤ 15             | -15 ≤ <i>h</i> ≤ 15,<br>-14 ≤ <i>k</i> ≤ 16,<br>-17 ≤ <i>l</i> ≤ 15             |
| Reflections collected                                           | 24900                                                                           | 17673                                                                           | 22391                                                                           |
| Independent reflections                                         | 7410 [ <i>R</i> <sub>int</sub> = 0.0558]                                        | 5286 [ <i>R</i> <sub>int</sub> = 0.0364]                                        | 7381 [ <i>R</i> <sub>int</sub> = 0.0454]                                        |
| Observed reflections                                            | 6435 [ <i>I</i> > 2σ( <i>I</i> )]                                               | 4766 [ <i>I</i> > 2σ( <i>I</i> )]                                               | 6257 [ <i>I</i> > 2σ( <i>I</i> )]                                               |
| Refined parameters/ restraints                                  | 375/0                                                                           | 255/0                                                                           | 349/27                                                                          |
| Goodness-of-fit on <i>F</i> <sup>2</sup>                        | 1.070                                                                           | 1.087                                                                           | 1.167                                                                           |
| <i>R</i> [ <i>F</i> <sup>2</sup> > 2σ( <i>F</i> <sup>2</sup> )] | <i>R</i> <sub>1</sub> = 0.0428,<br><i>wR</i> <sub>2</sub> = 0.1046              | <i>R</i> <sub>1</sub> = 0.0353,<br><i>wR</i> <sub>2</sub> = 0.0719              | <i>R</i> <sub>1</sub> = 0.0445,<br><i>wR</i> <sub>2</sub> = 0.0773              |
| <i>R</i> ( <i>F</i> <sup>2</sup> ) (all data)                   | <i>R</i> <sub>1</sub> = 0.0519,<br><i>wR</i> <sub>2</sub> = 0.1124              | <i>R</i> <sub>1</sub> = 0.0411,<br><i>wR</i> <sub>2</sub> = 0.0765              | <i>R</i> <sub>1</sub> = 0.0592,<br><i>wR</i> <sub>2</sub> = 0.0999              |
| Largest diff. peak/hole/eÅ <sup>-3</sup>                        | 2.338/-0.968                                                                    | 2.391/-1.478                                                                    | 1.147/-1.313                                                                    |

[Dy(RadH)(*hbp*m)Cl<sub>2</sub>] CH<sub>3</sub>CN (1), [Yb<sub>2</sub>(*ipap*m)<sub>2</sub>(NO<sub>3</sub>)<sub>4</sub>] (2), [Ce<sub>2</sub>(*ipap*m)<sub>2</sub>(NO<sub>3</sub>)<sub>4</sub>(EtOAc)<sub>2</sub>]·0.5EtOAc (3)

**Table S2.** Crystal data and structure refinement for compounds **4–6**.

| Identification code                                             | <b>4</b>                                                           | <b>5</b>                                                            | <b>6</b>                                                            |
|-----------------------------------------------------------------|--------------------------------------------------------------------|---------------------------------------------------------------------|---------------------------------------------------------------------|
| Empirical formula                                               | C <sub>15</sub> H <sub>17</sub> N <sub>3</sub> O                   | C <sub>15</sub> H <sub>16</sub> N <sub>3</sub> O <sub>2</sub>       | C <sub>40.5</sub> H <sub>44</sub> N <sub>6</sub> O <sub>5</sub>     |
| Formula weight                                                  | 255.31                                                             | 270.31                                                              | 694.81                                                              |
| Temperature/K                                                   | 150(2)                                                             | 293(2)                                                              | 300(2)                                                              |
| Space group                                                     | Cc                                                                 | Cc                                                                  | P3 <sub>2</sub>                                                     |
| <i>a</i> /Å                                                     | 14.3765(8)                                                         | 14.9436(8)                                                          | 18.0065(7)                                                          |
| <i>b</i> /Å                                                     | 7.9972(5)                                                          | 8.2469(4)                                                           |                                                                     |
| <i>c</i> /Å                                                     | 12.1337(6)                                                         | 12.1134(5)                                                          | 9.0454(5)                                                           |
| β/°                                                             | 105.412(2)                                                         | 112.917(2)                                                          |                                                                     |
| Volume/Å <sup>3</sup>                                           | 1344.87(13)                                                        | 1375.01(12)                                                         | 2539.9(2)                                                           |
| <i>Z</i>                                                        | 4                                                                  | 4                                                                   | 3                                                                   |
| ρ <sub>calc</sub> /g cm <sup>-3</sup>                           | 1.261                                                              | 1.306                                                               | 1.363                                                               |
| μ/mm <sup>-1</sup>                                              | 0.082                                                              | 0.089                                                               | 0.091                                                               |
| <i>F</i> (000)                                                  | 544                                                                | 572                                                                 | 1107                                                                |
| Crystal size/mm <sup>3</sup>                                    | 0.15 × 0.15 × 0.10                                                 | 0.25 × 0.15 × 0.10                                                  | 0.17 × 0.12 × 0.05                                                  |
| θ range/°                                                       | 2.939 to 30.516                                                    | 4.782 to 26.360                                                     | 1.306 to 25.685                                                     |
| <i>h</i> , <i>k</i> , <i>l</i> indices range                    | -20 ≤ <i>h</i> ≤ 19,<br>-11 ≤ <i>k</i> ≤ 9,<br>-17 ≤ <i>l</i> ≤ 15 | -18 ≤ <i>h</i> ≤ 18,<br>-10 ≤ <i>k</i> ≤ 10,<br>-15 ≤ <i>l</i> ≤ 14 | -17 ≤ <i>h</i> ≤ 21,<br>-21 ≤ <i>k</i> ≤ 20,<br>-11 ≤ <i>l</i> ≤ 11 |
| Reflections collected                                           | 8838                                                               | 5446                                                                | 20995                                                               |
| Independent reflections                                         | 3600 [ <i>R</i> <sub>int</sub> = 0.0325]                           | 2684 [ <i>R</i> <sub>int</sub> = 0.0315]                            | 6405 [ <i>R</i> <sub>int</sub> = 0.0391]                            |
| Observed reflections                                            | 3346 [ <i>I</i> > 2σ( <i>I</i> )]                                  | 2382 [ <i>I</i> > 2σ( <i>I</i> )]                                   | 4958 [ <i>I</i> > 2σ( <i>I</i> )]                                   |
| Refined parameters/ restraints                                  | 177/2                                                              | 252/15                                                              | 374/1                                                               |
| Goodness-of-fit on <i>F</i> <sup>2</sup>                        | 1.052                                                              | 1.082                                                               | 0.957                                                               |
| <i>R</i> [ <i>F</i> <sup>2</sup> > 2σ( <i>F</i> <sup>2</sup> )] | <i>R</i> <sub>1</sub> = 0.0482,<br><i>wR</i> <sub>2</sub> = 0.1313 | <i>R</i> <sub>1</sub> = 0.0358,<br><i>wR</i> <sub>2</sub> = 0.0766  | <i>R</i> <sub>1</sub> = 0.0423,<br><i>wR</i> <sub>2</sub> = 0.0990  |
| <i>R</i> ( <i>F</i> <sup>2</sup> ) (all data)                   | <i>R</i> <sub>1</sub> = 0.0514,<br><i>wR</i> <sub>2</sub> = 0.1352 | <i>R</i> <sub>1</sub> = 0.0426,<br><i>wR</i> <sub>2</sub> = 0.0801  | <i>R</i> <sub>1</sub> = 0.0575,<br><i>wR</i> <sub>2</sub> = 0.1045  |
| Largest diff. peak/hole/eÅ <sup>-3</sup>                        | 0.344/-0.246                                                       | 0.122/-0.108                                                        | 0.161/-0.134                                                        |

Table S3. Selected geometric parameters of **1**.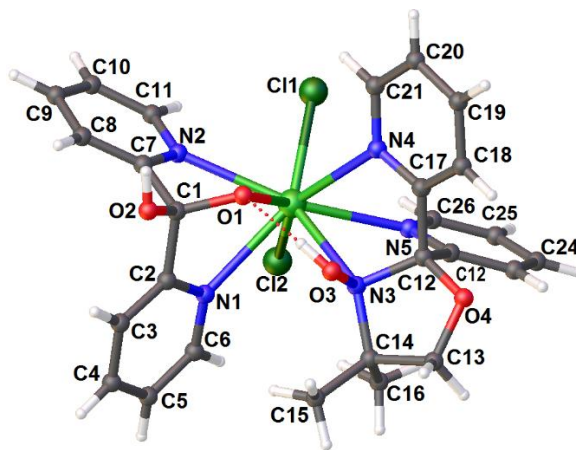

| Bond    | Length, Å   | Bond    | Length, Å | Angle       | °          |
|---------|-------------|---------|-----------|-------------|------------|
| Dy1—O1  | 2.270 (3)   | C4—C5   | 1.379 (8) | O1—Dy1—N5   | 131.94 (2) |
| Dy1—N5  | 2.529 (4)   | N5—C22  | 1.343 (6) | O1—Dy1—N2   | 65.82 (11) |
| Dy1—N2  | 2.550 (4)   | N5—C26  | 1.357 (6) | N5—Dy1—N2   | 159.50 (3) |
| Dy1—N1  | 2.599 (4)   | C5—C6   | 1.377 (7) | O1—Dy1—N1   | 66.83 (1)  |
| Dy1—N4  | 2.614 (4)   | N6—C28  | 1.146 (9) | N5—Dy1—N1   | 122.98 (2) |
| Dy1—Cl1 | 2.6264 (12) | C7—C8   | 1.385 (6) | N2—Dy1—N1   | 70.42 (2)  |
| Dy1—Cl2 | 2.6445 (12) | C8—C9   | 1.391 (7) | O1—Dy1—N4   | 73.48 (1)  |
| Dy1—N3  | 2.715 (4)   | C9—C10  | 1.384 (7) | N5—Dy1—N4   | 67.68 (2)  |
| O1—C1   | 1.393 (5)   | C10—C11 | 1.378 (7) | N2—Dy1—N4   | 117.01 (2) |
| N1—C2   | 1.342 (6)   | C12—C17 | 1.517 (6) | N1—Dy1—N4   | 131.35 (2) |
| N1—C6   | 1.353 (6)   | C12—C22 | 1.533 (7) | O1—Dy1—Cl1  | 115.24 (8) |
| C1—O2   | 1.390 (5)   | C13—C14 | 1.545 (8) | N5—Dy1—Cl1  | 84.05 (10) |
| C1—C7   | 1.533 (6)   | C14—C15 | 1.519 (8) | N2—Dy1—Cl1  | 77.75 (9)  |
| C1—C2   | 1.535 (6)   | C14—C16 | 1.531 (7) | N1—Dy1—Cl1  | 143.66 (9) |
| N2—C11  | 1.339 (6)   | C17—C18 | 1.374 (7) | N4—Dy1—Cl1  | 78.82 (9)  |
| N2—C7   | 1.339 (6)   | C18—C19 | 1.378 (7) | O1—Dy1—Cl2  | 140.80 (9) |
| C2—C3   | 1.386 (7)   | C19—C20 | 1.382 (7) | N5—Dy1—Cl2  | 77.49 (10) |
| O3—N3   | 1.448 (5)   | C20—C21 | 1.388 (7) | N2—Dy1—Cl2  | 92.91 (9)  |
| N3—C12  | 1.487 (6)   | C22—C23 | 1.385 (7) | N1—Dy1—Cl2  | 75.25 (8)  |
| N3—C14  | 1.522 (6)   | C23—C24 | 1.384 (8) | N4—Dy1—Cl2  | 144.13 (9) |
| C3—C4   | 1.387 (7)   | C24—C25 | 1.358 (8) | Cl1—Dy1—Cl2 | 89.61 (4)  |
| O4—C12  | 1.414 (5)   | C25—C26 | 1.378 (7) | O1—Dy1—N3   | 72.78 (11) |
| O4—C13  | 1.433 (7)   | C27—C28 | 1.428 (9) | N5—Dy1—N3   | 65.39 (12) |
| N4—C21  | 1.344 (6)   | C9—C10  | 1.384 (7) | N2—Dy1—N3   | 135.10 (2) |
| N4—C17  | 1.351 (6)   |         |           | N1—Dy1—N3   | 78.10 (2)  |

**Table S4.** Selected geometric parameters of a monomeric moiety of [Yb<sub>2</sub>(*ipapm*)<sub>2</sub>(NO<sub>3</sub>)<sub>4</sub>] (**2**).
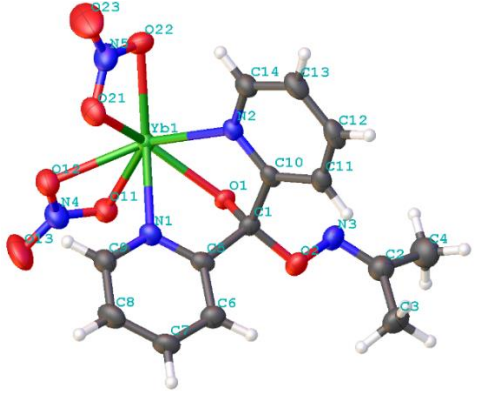

| Bond                 | Length, Å  | Angle                                | °           |
|----------------------|------------|--------------------------------------|-------------|
| Yb1—O1 <sup>i</sup>  | 2.208 (3)  | O1 <sup>i</sup> —Yb1—O1              | 68.93 (12)  |
| Yb1—O1               | 2.265 (3)  | O1 <sup>i</sup> —Yb1—O21             | 141.60 (12) |
| Yb1—O21              | 2.371 (3)  | O1—Yb1—O21                           | 138.24 (12) |
| Yb1—O11              | 2.392 (3)  | O1 <sup>i</sup> —Yb1—O11             | 84.23 (12)  |
| Yb1—O12              | 2.397 (3)  | O1—Yb1—O11                           | 77.19 (11)  |
| Yb1—O22              | 2.408 (3)  | O21—Yb1—O11                          | 122.70 (12) |
| Yb1—N1               | 2.493 (4)  | O1 <sup>i</sup> —Yb1—O12             | 126.10 (12) |
| Yb1—N2               | 2.557 (4)  | O1—Yb1—O12                           | 120.54 (12) |
| Yb1—N3 <sup>i</sup>  | 2.647 (4)  | O21—Yb1—O12                          | 69.92 (12)  |
| Yb1—Yb1 <sup>i</sup> | 3.6877 (4) | O11—Yb1—O12                          | 52.99 (12)  |
| O1—C1                | 1.382 (5)  | O1 <sup>i</sup> —Yb1—O22             | 88.73 (11)  |
| N1—C5                | 1.329 (6)  | O1—Yb1—O22                           | 130.96 (11) |
| N1—C9                | 1.363 (6)  | O21—Yb1—O22                          | 53.29 (12)  |
| C1—O2                | 1.404 (5)  | O11—Yb1—O22                          | 145.52 (12) |
| C1—C5                | 1.525 (6)  | O12—Yb1—O22                          | 108.03 (12) |
| C1—C10               | 1.538 (6)  | O1 <sup>i</sup> —Yb1—N1              | 136.04 (12) |
| O2—N3                | 1.433 (5)  | O1—Yb1—N1                            | 67.49 (11)  |
| N2—C14               | 1.337 (6)  | O21—Yb1—N1                           | 79.24 (13)  |
| N2—C10               | 1.344 (6)  | O11—Yb1—N1                           | 80.97 (13)  |
| C2—N3                | 1.283 (7)  | O12—Yb1—N1                           | 73.96 (13)  |
| C2—C4                | 1.470 (8)  | O22—Yb1—N1                           | 124.86 (12) |
| C2—C3                | 1.493 (7)  | O1 <sup>i</sup> —Yb1—N2              | 94.60 (11)  |
| N4—O13               | 1.221 (5)  | O1—Yb1—N2                            | 66.53 (11)  |
| N4—O11               | 1.242 (5)  | O21—Yb1—N2                           | 80.53 (12)  |
| N4—O12               | 1.273 (5)  | O11—Yb1—N2                           | 141.28 (12) |
| N5—O23               | 1.209 (6)  | O12—Yb1—N2                           | 139.11 (12) |
| N5—O21               | 1.261 (6)  | O22—Yb1—N2                           | 72.84 (12)  |
| N5—O22               | 1.271 (6)  | N1—Yb1—N2                            | 73.23 (12)  |
| C5—C6                | 1.394 (6)  | O1 <sup>i</sup> —Yb1—N3 <sup>i</sup> | 64.09 (12)  |
| C6—C7                | 1.376 (7)  | O1—Yb1—N3 <sup>i</sup>               | 129.30 (12) |
| C7—C8                | 1.388 (7)  | O21—Yb1—N3 <sup>i</sup>              | 91.92 (13)  |
| C8—C9                | 1.377 (7)  | O11—Yb1—N3 <sup>i</sup>              | 80.20 (13)  |
| C10—C11              | 1.390 (6)  | O12—Yb1—N3 <sup>i</sup>              | 76.34 (13)  |
| C11—C12              | 1.387 (7)  | O22—Yb1—N3 <sup>i</sup>              | 66.45 (13)  |
| C12—C13              | 1.383 (8)  | N1—Yb1—N3 <sup>i</sup>               | 150.27 (13) |
| C13—C14              | 1.383 (7)  | N2—Yb1—N3 <sup>i</sup>               | 133.67 (12) |

Symmetry code: (i)  $-x+1, -y+1, -z+1$ .

**Table S5.** Selected geometric parameters of a monomeric moiety of  $[\text{Ce}_2(\text{ipapm})_2(\text{NO}_3)_4(\text{EtOAc})_2]$  (3)
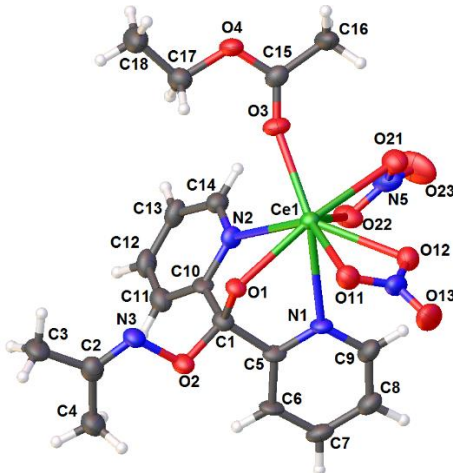

| Bond                 | Length, Å  | Angle                    | °           |
|----------------------|------------|--------------------------|-------------|
| Ce1—O1 <sup>i</sup>  | 2.400 (3)  | O1 <sup>i</sup> —Ce1—O1  | 65.83 (11)  |
| Ce1—O1               | 2.449 (3)  | O1 <sup>i</sup> —Ce1—O3  | 76.03 (10)  |
| Ce1—O3               | 2.530 (3)  | O1—Ce1—O3                | 114.95 (11) |
| Ce1—O12              | 2.576 (3)  | O1 <sup>i</sup> —Ce1—O12 | 124.28 (10) |
| Ce1—O22              | 2.590 (3)  | O1—Ce1—O12               | 113.13 (10) |
| Ce1—O11              | 2.607 (3)  | O3—Ce1—O12               | 131.90 (11) |
| Ce1—N2               | 2.684 (3)  | O1 <sup>i</sup> —Ce1—O22 | 151.32 (11) |
| Ce1—N1               | 2.727 (3)  | O1—Ce1—O22               | 117.52 (10) |
| Ce1—O21              | 2.733 (4)  | O3—Ce1—O22               | 77.37 (11)  |
| Ce1—N3 <sup>i</sup>  | 2.813 (4)  | O12—Ce1—O22              | 82.07 (12)  |
| Ce1—Ce1 <sup>i</sup> | 4.0702 (5) | O1 <sup>i</sup> —Ce1—O11 | 80.43 (11)  |
| O1—C1                | 1.364 (5)  | O1—Ce1—O11               | 76.03 (10)  |
| N1—C5                | 1.317 (6)  | O3—Ce1—O11               | 145.87 (11) |
| N1—C9                | 1.355 (6)  | O12—Ce1—O11              | 49.20 (11)  |
| C1—O2                | 1.443 (5)  | O22—Ce1—O11              | 128.21 (12) |
| C1—C10               | 1.526 (6)  | O1 <sup>i</sup> —Ce1—N2  | 94.62 (10)  |
| C1—C5                | 1.537 (6)  | O1—Ce1—N2                | 61.62 (11)  |
| O2—N3                | 1.449 (5)  | O3—Ce1—N2                | 71.86 (11)  |
| N2—C14               | 1.334 (6)  | O12—Ce1—N2               | 136.11 (11) |
| N2—C10               | 1.344 (5)  | O22—Ce1—N2               | 66.84 (12)  |
| C2—N3                | 1.281 (6)  | O11—Ce1—N2               | 135.01 (11) |
| C2—C3                | 1.478 (7)  | O1 <sup>i</sup> —Ce1—N1  | 126.22 (10) |
| C2—C4                | 1.507 (7)  | O1—Ce1—N1                | 61.93 (10)  |
| O3—C15               | 1.214 (6)  | O3—Ce1—N1                | 138.35 (11) |
| O4—C15               | 1.319 (5)  | O12—Ce1—N1               | 69.07 (11)  |
| O4—C17               | 1.461 (6)  | O22—Ce1—N1               | 70.37 (11)  |
| N4—O13               | 1.226 (5)  | O11—Ce1—N1               | 75.76 (11)  |
| N4—O11               | 1.263 (5)  | N2—Ce1—N1                | 71.62 (11)  |
| N4—O12               | 1.266 (5)  | O1 <sup>i</sup> —Ce1—O21 | 128.54 (10) |
| O5—C19               | 1.185 (8)  | O1—Ce1—O21               | 164.72 (10) |
| N5—O23               | 1.221 (5)  | O3—Ce1—O21               | 68.98 (11)  |
| N5—O21               | 1.257 (5)  | O12—Ce1—O21              | 65.03 (11)  |
| N5—O22               | 1.270 (6)  | O22—Ce1—O21              | 47.68 (11)  |
| C5—C6                | 1.400 (6)  | O11—Ce1—O21              | 109.38 (11) |

|                                                                |           |                                      |             |
|----------------------------------------------------------------|-----------|--------------------------------------|-------------|
| C6—C7                                                          | 1.375 (7) | N2—Ce1—O21                           | 108.32 (11) |
| C7—C8                                                          | 1.391 (7) | N1—Ce1—O21                           | 104.83 (11) |
| C8—C9                                                          | 1.368 (7) | O1 <sup>i</sup> —Ce1—N3 <sup>i</sup> | 62.57 (10)  |
| C11—C12                                                        | 1.376 (7) | O1—Ce1—N3 <sup>i</sup>               | 123.46 (10) |
| C12—C13                                                        | 1.381 (7) | O3—Ce1—N3 <sup>i</sup>               | 73.07 (11)  |
| C12—H12                                                        | 0.9500    | O12—Ce1—N3 <sup>i</sup>              | 79.89 (11)  |
| C13—C14                                                        | 1.385 (6) | O22—Ce1—N3 <sup>i</sup>              | 118.74 (11) |
| C15—C16                                                        | 1.483 (7) | O11—Ce1—N3 <sup>i</sup>              | 74.27 (11)  |
| C17—C18                                                        | 1.480 (7) | N2—Ce1—N3 <sup>i</sup>               | 141.89 (12) |
| C19—C20                                                        | 1.565 (9) | N1—Ce1—N3 <sup>i</sup>               | 146.38 (12) |
| C21—C22                                                        | 1.400 (8) | O21—Ce1—N3 <sup>i</sup>              | 71.72 (11)  |
| Symmetry codes: (i) $-x+1, -y+1, -z+1$ ; (ii) $-x, -y+1, -z$ . |           |                                      |             |

**Table S6.** Selected geometric parameters of **4**.

| 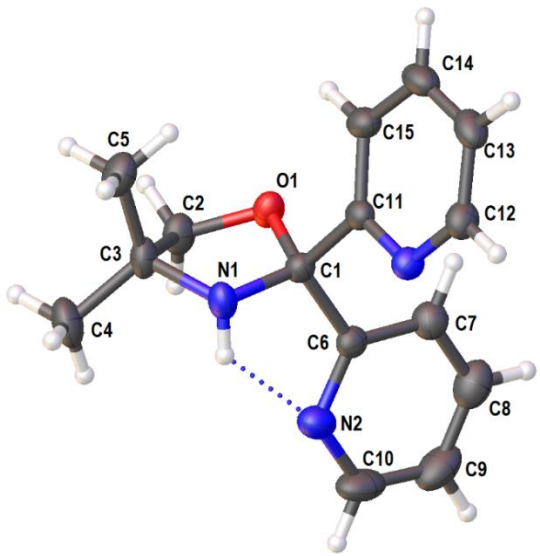 |             |            |             |
|-------------------------------------------------------------------------------------|-------------|------------|-------------|
| Bond                                                                                | Length, Å   | Angle      | °           |
| Dy1—O1                                                                              | 2.270 (3)   | O1—Dy1—N5  | 131.94 (12) |
| Dy1—N5                                                                              | 2.529 (4)   | O1—Dy1—N2  | 65.82 (11)  |
| Dy1—N2                                                                              | 2.550 (4)   | N5—Dy1—N2  | 159.50 (13) |
| Dy1—N1                                                                              | 2.599 (4)   | O1—Dy1—N1  | 66.83 (11)  |
| Dy1—N4                                                                              | 2.614 (4)   | N5—Dy1—N1  | 122.98 (12) |
| Dy1—Cl1                                                                             | 2.6264 (12) | N2—Dy1—N1  | 70.42 (12)  |
| Dy1—Cl2                                                                             | 2.6445 (12) | O1—Dy1—N4  | 73.48 (11)  |
| Dy1—N3                                                                              | 2.715 (4)   | N5—Dy1—N4  | 67.68 (12)  |
| O1—C1                                                                               | 1.393 (5)   | N2—Dy1—N4  | 117.01 (12) |
| N1—C2                                                                               | 1.342 (6)   | N1—Dy1—N4  | 131.35 (12) |
| N1—C6                                                                               | 1.353 (6)   | O1—Dy1—Cl1 | 115.24 (8)  |
| C1—O2                                                                               | 1.390 (5)   | N5—Dy1—Cl1 | 84.05 (10)  |
| C1—C7                                                                               | 1.533 (6)   | N2—Dy1—Cl1 | 77.75 (9)   |
| C1—C2                                                                               | 1.535 (6)   | N1—Dy1—Cl1 | 143.66 (9)  |
| N2—C11                                                                              | 1.339 (6)   | N4—Dy1—Cl1 | 78.82 (9)   |
| N2—C7                                                                               | 1.339 (6)   | O1—Dy1—Cl2 | 140.80 (9)  |
| C2—C3                                                                               | 1.386 (7)   | N5—Dy1—Cl2 | 77.49 (10)  |
| O3—N3                                                                               | 1.448 (5)   | N2—Dy1—Cl2 | 92.91 (9)   |

|         |           |             |             |
|---------|-----------|-------------|-------------|
| O3—H3A  | 0.8400    | N1—Dy1—Cl2  | 75.25 (8)   |
| N3—C12  | 1.487 (6) | N4—Dy1—Cl2  | 144.13 (9)  |
| N3—C14  | 1.522 (6) | Cl1—Dy1—Cl2 | 89.61 (4)   |
| C3—C4   | 1.387 (7) | O1—Dy1—N3   | 72.78 (11)  |
| O4—C12  | 1.414 (5) | N5—Dy1—N3   | 65.39 (12)  |
| O4—C13  | 1.433 (7) | N2—Dy1—N3   | 135.10 (12) |
| N4—C21  | 1.344 (6) | N1—Dy1—N3   | 78.10 (12)  |
| N4—C17  | 1.351 (6) | N4—Dy1—N3   | 63.86 (12)  |
| C4—C5   | 1.379 (8) | Cl1—Dy1—N3  | 138.20 (9)  |
| N5—C22  | 1.343 (6) | Cl2—Dy1—N3  | 109.35 (8)  |
| N5—C26  | 1.357 (6) | C1—O1—Dy1   | 114.4 (2)   |
| C5—C6   | 1.377 (7) | C2—N1—C6    | 117.3 (4)   |
| N6—C28  | 1.146 (9) | C2—N1—Dy1   | 111.9 (3)   |
| C7—C8   | 1.385 (6) | C6—N1—Dy1   | 130.7 (3)   |
| C8—C9   | 1.391 (7) | O2—C1—O1    | 113.6 (4)   |
| C9—C10  | 1.384 (7) | O2—C1—C7    | 113.4 (4)   |
| C10—C11 | 1.378 (7) | O1—C1—C7    | 107.3 (4)   |
| C12—C17 | 1.517 (6) | O2—C1—C2    | 106.5 (4)   |
| C12—C22 | 1.533 (7) | O1—C1—C2    | 109.6 (3)   |
| C13—C14 | 1.545 (8) | C7—C1—C2    | 106.2 (4)   |
| C14—C15 | 1.519 (8) | C1—O2—H2    | 109.5       |
| C14—C16 | 1.531 (7) | C11—N2—C7   | 117.8 (4)   |
| C17—C18 | 1.374 (7) | C2—N1—Dy1   | 111.9 (3)   |
| C18—C19 | 1.378 (7) | C6—N1—Dy1   | 130.7 (3)   |
| C19—C20 | 1.382 (7) | C11—N2—Dy1  | 128.6 (3)   |
| C20—C21 | 1.388 (7) | C7—N2—Dy1   | 113.4 (3)   |
| C22—C23 | 1.385 (7) | O3—N3—Dy1   | 106.0 (2)   |
| C23—C24 | 1.384 (8) | C12—N3—Dy1  | 101.5 (3)   |
| C24—C25 | 1.358 (8) | C14—N3—Dy1  | 134.3 (3)   |
| C25—C26 | 1.378 (7) | C21—N4—Dy1  | 123.9 (3)   |
| C27—C28 | 1.428 (9) | C17—N4—Dy1  | 118.5 (3)   |

Table S7. Selected geometric parameters of 5.

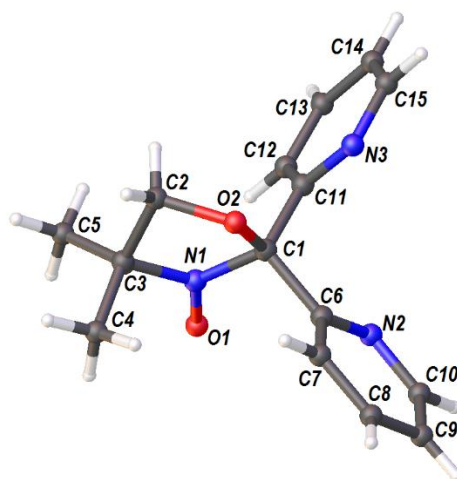

| Bond      | Length, Å  | Angle       | °         |
|-----------|------------|-------------|-----------|
| O1—N1     | 1.252 (4)  | C1—O2—C2    | 106.9 (3) |
| O2—C1     | 1.422 (5)  | O1—N1—C1    | 123.9 (3) |
| O2—C2     | 1.444 (5)  | O1—N1—C3    | 123.0 (5) |
| N1—C1     | 1.476 (5)  | C1—N1—C3    | 112.7 (5) |
| N1—C3     | 1.488 (8)  | C10—N2—C6   | 116.4 (2) |
| N2—C10    | 1.332 (4)  | C11—N3—C15  | 116.4 (3) |
| N2—C6     | 1.337 (3)  | O2—C1—N1    | 101.8 (3) |
| N3—C11    | 1.331 (3)  | O2—C1—C6    | 111.2 (3) |
| N3—C15    | 1.344 (4)  | N1—C1—C6    | 108.3 (3) |
| C1—C6     | 1.524 (5)  | O2—C1—C11   | 112.3 (3) |
| C1—C11    | 1.538 (5)  | N1—C1—C11   | 111.2 (3) |
| C2—C3     | 1.527 (12) | C6—C1—C11   | 111.5 (3) |
| C3—C5     | 1.515 (8)  | O2—C2—C3    | 104.5 (4) |
| C3—C4     | 1.521 (7)  | N1—C3—C5    | 108.5 (6) |
| C6—C7     | 1.383 (3)  | N1—C3—C4    | 109.5 (6) |
| C7—C8     | 1.380 (4)  | C5—C3—C4    | 113.0 (6) |
| C8—C9     | 1.372 (4)  | N1—C3—C2    | 97.8 (5)  |
| C9—C10    | 1.378 (4)  | C5—C3—C2    | 114.6 (6) |
| C11—C12   | 1.365 (3)  | C4—C3—C2    | 112.2 (6) |
| C12—C13   | 1.378 (4)  | N1—C3—C5    | 108.5 (6) |
| C13—C14   | 1.350 (5)  | N1—C3—C4    | 109.5 (6) |
| C14—C15   | 1.369 (5)  | C5—C3—C4    | 113.0 (6) |
| C8—C9—C10 | 118.1 (3)  | N2—C6—C7    | 123.5 (2) |
| N2—C10—C9 | 124.4 (2)  | N2—C6—C1    | 118.0 (2) |
|           |            | C7—C6—C1    | 118.5 (3) |
|           |            | C8—C7—C6    | 118.4 (2) |
|           |            | N3—C11—C12  | 123.5 (2) |
|           |            | N3—C11—C1   | 110.1 (2) |
|           |            | C12—C11—C1  | 126.4 (3) |
|           |            | C11—C12—C13 | 118.7 (3) |
|           |            | C14—C13—C12 | 119.1 (3) |



|  |  |             |           |
|--|--|-------------|-----------|
|  |  | C13—C14—C15 | 119.0 (3) |
|  |  | N3—C11—C12  | 123.5 (2) |
|  |  | N3—C11—C1   | 110.1 (2) |
|  |  | C12—C11—C1  | 126.4 (3) |
|  |  | C11—C12—C13 | 118.7 (3) |
|  |  | N3—C11—C12  | 123.5 (2) |
|  |  | C14—C13—C12 | 119.1 (3) |
|  |  | C13—C14—C15 | 119.0 (3) |
|  |  | N3—C15—C14  | 123.3 (3) |

**Table S8.** Selected parameters geometric of 6.

| 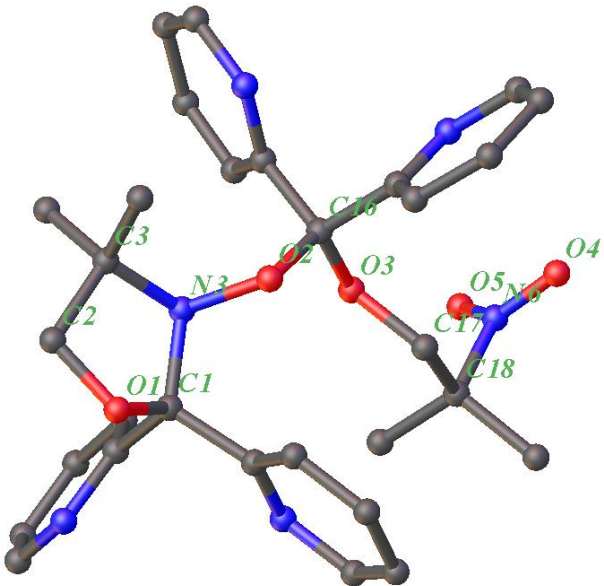 |           |            |             |
|-------------------------------------------------------------------------------------|-----------|------------|-------------|
| Bond                                                                                | Length, Å | Angle      | °           |
| O3—C16                                                                              | 1.406 (3) | O4—N6—O5   | 124.3 (4)   |
| O3—C17                                                                              | 1.410 (3) | O4—N6—C18  | 118.0 (3)   |
| O2—C16                                                                              | 1.432 (3) | O5—N6—C18  | 117.7 (4)   |
| O2—N3                                                                               | 1.455 (3) | C16—O2—N3  | 111.84 (19) |
| O1—C2                                                                               | 1.405 (4) | O2—N3—C1   | 109.2 (2)   |
| O1—C1                                                                               | 1.419 (4) | O2—N3—C3   | 109.5 (2)   |
| N3—C1                                                                               | 1.498 (4) | C1—N3—C3   | 104.0 (2)   |
| N3—C3                                                                               | 1.536 (4) | C16—O3—C17 | 117.7 (2)   |
| N6—O4                                                                               | 1.202 (4) | C16—O2—N3  | 111.84 (19) |
| N6—O5                                                                               | 1.213 (4) | O2—N3—C1   | 109.2 (2)   |
| N6—C18                                                                              | 1.534 (5) | O2—N3—C3   | 109.5 (2)   |
